# Supplementary material
Source: Research Square preprint supplement (doi:10.21203/rs.3.rs-9280779/v1)
Supplement: Supplementary file 1 [file 48229a2e166f66b15cacb3b5.pdf]

## Supplementary Information

### Contents:

- **Supplementary Figure 1.** High resolution mass spectrometry of (7-(2-aminoethyl)-3,4-dihydro-5-hydroxy-2*H*-benzo[*b*][1,4]thiazine-3-carboxylic acid) (DHBT-1).
- **Supplementary Figure 2.** High resolution mass spectrometry of 7-(2-aminoethyl)-2,2-dimethyl-2*H*-benzo[*b*][1,4]thiazin-5-ol (Me<sub>2</sub>BT-2).

73024-11 #2-50 RT: 0.01-0.19 AV: 24 SB: 86 0.29-0.95 NL: 3.36E8  
T: FTMS + c ESI Full ms [150.0000-2000.0000]

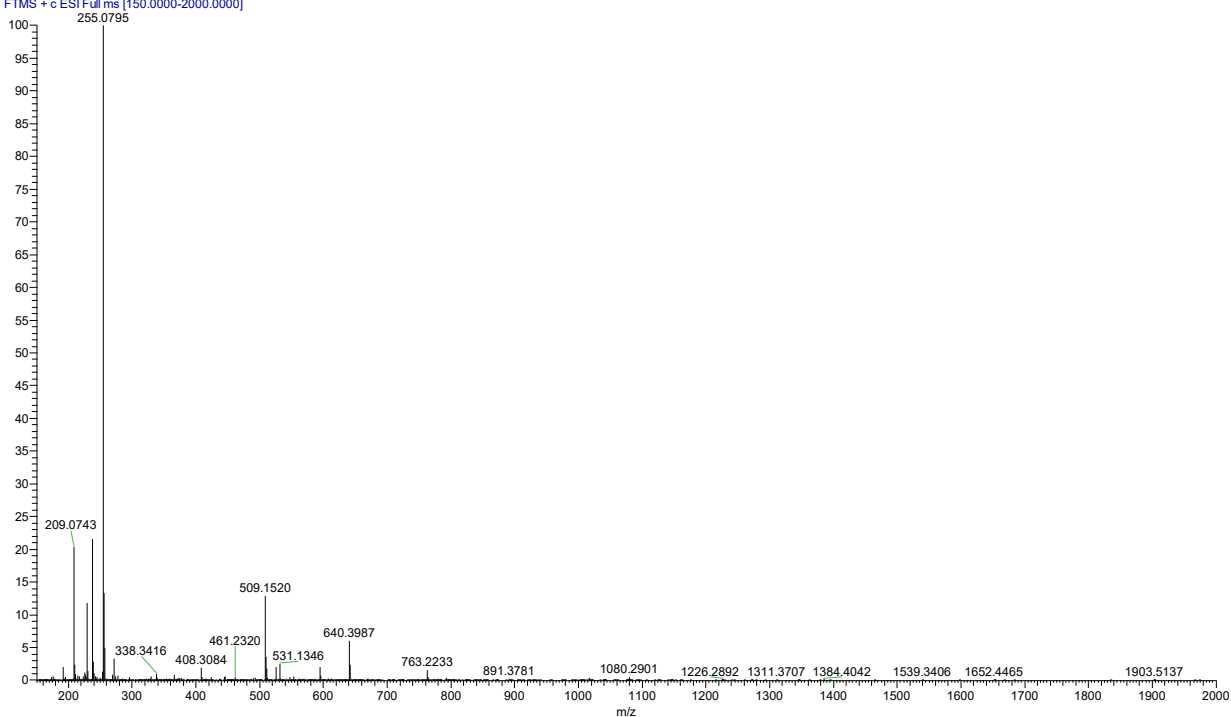

Supplementary Figure 1. High resolution mass spectrometry of (7-(2-aminoethyl)-3,4-dihydro-5-hydroxy-2H-benzo[b][1,4]thiazine-3-carboxylic acid) (DHBT-1,  $C_{11}H_{14}N_2O_3S$ ). Theoretical = 255.0803; Observed = 255.0795. High resolution mass spectrometry was performed on a Thermo Scientific LTQ Orbitrap XL spectrometer in the Lumigen Instrument Center.

73124-13 #9-221 RT: 0.04-0.85 AV: 107 NL: 1.62E9  
T: FTMS + c ESI Full ms [150.0000-2000.0000]

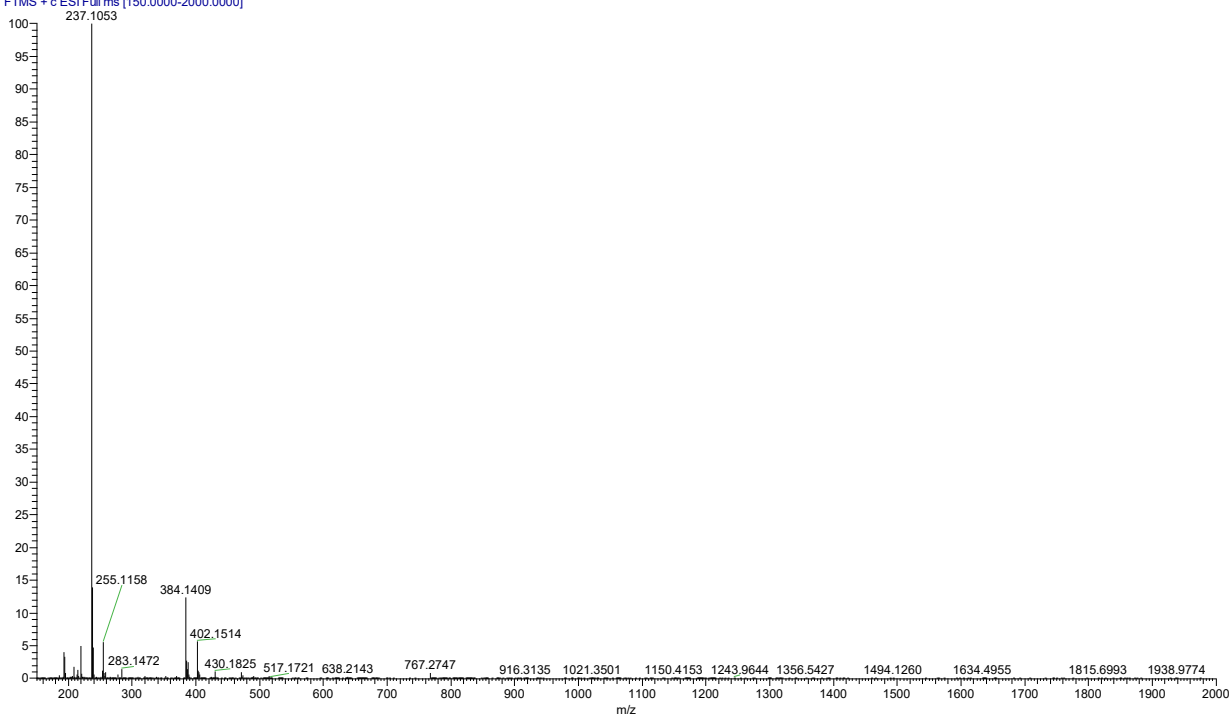

Supplementary Figure 2. High resolution mass spectrometry of 7-(2-aminoethyl)-2,2-dimethyl-2*H*-benzo[b][1,4]thiazin-5-ol (Me<sub>2</sub>BT-2, C<sub>12</sub>H<sub>16</sub>N<sub>2</sub>OS). Theoretical = 237.1062; Observed = 237.1053. High resolution mass spectrometry was performed on a Thermo Scientific LTQ Orbitrap XL spectrometer in the Lumigen Instrument Center.
